# Supplementary material for: Evaluating the clinical performance of a novel dual-target stool DNA test for colorectal cancer detection
Source: bioRxiv or medRxiv preprint supplement (doi:10.1101/2021.03.10.21252951), 2021-03-24
Supplement: Supplementary file [file media-1.pdf]

**Supplemental Table 1** Summary of the participants received colonoscopy or histopathological examinations.

| Group                | Diseases             | Colonoscopy    | Histological | Total |    |
|----------------------|----------------------|----------------|--------------|-------|----|
| Normal               |                      | 300            | 0            | 300   |    |
|                      | Anal cancer          | 0              | 1            | 1     |    |
|                      | Appendix cancer      | 1              | 1            | 2     |    |
|                      | Colon polypus        | 1              | 72           | 73    |    |
|                      | Coloproctitis        | 31             | 139          | 170   |    |
|                      | Diverticulum         | 15             | 1            | 16    |    |
|                      | Interfering diseases | Esophagitis    | 0            | 1     | 1  |
|                      |                      | Gastric polyps | 11           | 1     | 12 |
|                      |                      | Gastritis      | 13           | 2     | 15 |
|                      |                      | Hemorrhoids    | 65           | 5     | 70 |
| Liver cancer         |                      | 0              | 2            | 2     |    |
| Stomach cancer       |                      | 0              | 6            | 6     |    |
| Other                |                      | 18             | 10           | 28    |    |
| Non-advanced adenoma |                      | 0              | 110          | 110   |    |
| Adenoma              | Advanced adenoma     | 0              | 38           | 38    |    |
|                      |                      |                |              |       |    |
| CRC                  |                      | 0              | 320          | 320   |    |
| Total                |                      | 455            | 709          | 1164  |    |

**Note:** if the participants received both colonoscopy and histopathological examinations, we only used the histopathological examinations to determine their disease status.

**Supplementary Table 2** Performance of methylated *SDC2* and *TFPI2* in detection of CRCs and other groups.

| Traget      | Sensitivity (%) | Specificity (%) | AUC(95%CI)      | Compared group                 |
|-------------|-----------------|-----------------|-----------------|--------------------------------|
| SDC2        | 71.74           | 96.2            | 0.84(0.81~0.86) | All non-CRC vs CRC             |
| TFPI2       | 83.85           | 88.95           | 0.86(0.84~0.89) | All non-CRC vs CRC             |
| Dual-target | 95.34           | 88.36           | 0.92(0.90~0.93) | All non-CRC vs CRC             |
| SDC2        | 71.74           | 100             | 0.86(0.84~0.88) | Normal vs CRC                  |
| TFPI2       | 83.85           | 96.67           | 0.90(0.88~0.93) | Normal vs CRC                  |
| Dual-target | 95.34           | 96.67           | 0.96(0.94~0.97) | Normal vs CRC                  |
| SDC2        | 18.24           | 100             | 0.59(0.56~0.63) | Normal vs Adenoma              |
| TFPI2       | 39.19           | 96.67           | 0.68(0.64~0.71) | Normal vs Adenoma              |
| Dual-target | 41.22           | 96.67           | 0.69(0.66~0.73) | Normal vs Adenoma              |
| SDC2        | 36.84           | 100             | 0.68(0.61~0.77) | Normal vs Advanced adenoma     |
| TFPI2       | 57.89           | 96.67           | 0.77(0.70~0.84) | Normal vs Advanced adenoma     |
| Dual-target | 63.16           | 96.67           | 0.80(0.73~0.87) | Normal vs Advanced adenoma     |
| SDC2        | 11.82           | 100             | 0.56(0.53~0.59) | Normal vs Non-advanced adenoma |
| TFPI2       | 32.73           | 96.67           | 0.65(0.61~0.69) | Normal vs Non-advanced adenoma |
| Dual-target | 33.64           | 96.67           | 0.65(0.62~0.70) | Normal vs Non-advanced adenoma |
| SDC2        | 73.01           | 100             | 0.87(0.83~0.90) | Normal vs Stage I-II           |
| TFPI2       | 81.6            | 96.67           | 0.89(0.87~0.92) | Normal vs Stage I-II           |
| Dual-target | 96.93           | 96.67           | 0.97(0.95~0.98) | Normal vs Stage I-II           |

|             |       |       |                 |                        |
|-------------|-------|-------|-----------------|------------------------|
| SDC2        | 69.18 | 100   | 0.85(0.81~0.88) | Normal vs Stage III-IV |
| TFPI2       | 84.93 | 96.67 | 0.91(0.88~0.94) | Normal vs Stage III-IV |
| Dual-target | 93.15 | 96.67 | 0.95(0.92~0.97) | Normal vs Stage III-IV |

**Supplementary Table 3** Performance of the DT-sDNA test in discriminating interfering diseases from CRCs.

| Interfering diseases | Subject (% , n)  | Positive detection rate (% , n) | Specificity (% , n) |
|----------------------|------------------|---------------------------------|---------------------|
| Colon polypus        | 18.53 (73)       | 2.23% (9)                       | 87.67 (64)          |
| Coloproctitis        | 42.89 (169)      | 2.48% (10)                      | 94.08 (159)         |
| Diverticulum         | 4.06 (16)        | 0.25% (1)                       | 93.75 (15)          |
| Esophagitis          | 0.25 (1)         | 0 (0)                           | 100 (1)             |
| Gastric polyps       | 3.05 (12)        | 0 (0)                           | 100 (12)            |
| Gastritis            | 3.81 (15)        | 0 (0)                           | 100 (15)            |
| Hemorrhoids          | 17.77 (70)       | 0.99% (4)                       | 94.29 (66)          |
| Liver cancer         | 0.51 (2)         | 0 (0)                           | 100 (2)             |
| Stomach cancer       | 1.27 (5)         | 0.25% (1)                       | 80 (4)              |
| Appendix cancer      | 0.51 (2)         | 0 (0)                           | 100 (2)             |
| Anal cancer          | 0.25 (1)         | 0 (0)                           | 100 (1)             |
| Other                | 7.11 (28)        | 0.5% (2)                        | 92.86 (26)          |
| <b>Total</b>         | <b>100 (394)</b> | <b>6.70% (27)</b>               | <b>93.15 (367)</b>  |

**Supplementary Table 4** Retested results of 34 resected patients by DT-sDNA test.

|                |          | Before resected |          |
|----------------|----------|-----------------|----------|
|                |          | Positive        | Negative |
| After resected | Positive | 2               | 0        |
|                | Negative | 28              | 4        |

**Supplementary Table 5** Performance of CEA and CA19-9 for CRC detection.

|                 | CEA      |          |             |             | CA19-9   |          |             |             |
|-----------------|----------|----------|-------------|-------------|----------|----------|-------------|-------------|
|                 | Negative | Positive | Sensitivity | Specificity | Negative | Positive | Sensitivity | Specificity |
| Healthy control | 88       | 11       | 0.29        | 0.89        | 74       | 7        | 0.12        | 0.91        |
| CRC             | 112      | 45       |             |             | 131      | 17       |             |             |
